# Supplementary material for: Binding TiO2 nanoparticles to forward osmosis membranes via MEMO–PMMA–Br monomer chains for enhanced filtration and antifouling performance
Source: PubMed Central journal article supplement — RSC Adv. 2018 May 23;8(34):19024–33. doi: 10.1039/c8ra03613f (PMC9080677; doi:10.1039/c8ra03613f), 2018-05-23
Supplement: RA-008-C8RA03613F-s001.pdf [file RA-008-C8RA03613F-s001.pdf]

1 **Support Information**

2

3 **Binding TiO<sub>2</sub> nanoparticles to forward osmosis membranes via MEMO-**  
4 **PMMA-Br monomer chains for enhanced filtration and antifouling**  
5 **performance**

6

7

8 Wenchao Xue<sup>a b \*\*</sup>, Kaung Ko Ko Sint<sup>a</sup>, Piyasan Prasertthdam<sup>c</sup>, Kazuo Yamamoto<sup>b d</sup>, Chavalit Ratanatamskul<sup>a \*</sup>

9

<sup>a</sup> Department of Environmental Engineering, Faculty of Engineering, Chulalongkorn University, 254 Phayathai Road, Patumwan, Bangkok 10330, Thailand.

10 <sup>b</sup> Department of Energy, Environment, and Climate Change, School of Environment, Resources, and  
11 Development, Asian Institute of Technology, Pathumthani 12120, Thailand.

12 <sup>c</sup> Department of Chemical Engineering, Faculty of Engineering, Chulalongkorn University, 254 Phayathai  
13 Road, Patumwan, Bangkok 10330, Thailand.

14 <sup>d</sup> Environmental Science Center, The University of Tokyo, 7-3-1 Hongo, Bunkyo-ku, Tokyo 113-0033,  
15 Japan.

16

\*Corresponding author. Tel: +66(0)2-2186678; Fax: +66(0)2-2186678.

E-mail: dr\_chawalit@yahoo.com

17 \*\* Co-corresponding author. Tel: +66(0)2-5245626; Fax: +66(0)2-5245625.

18 E-mail: wenchao@ait.ac.th

19

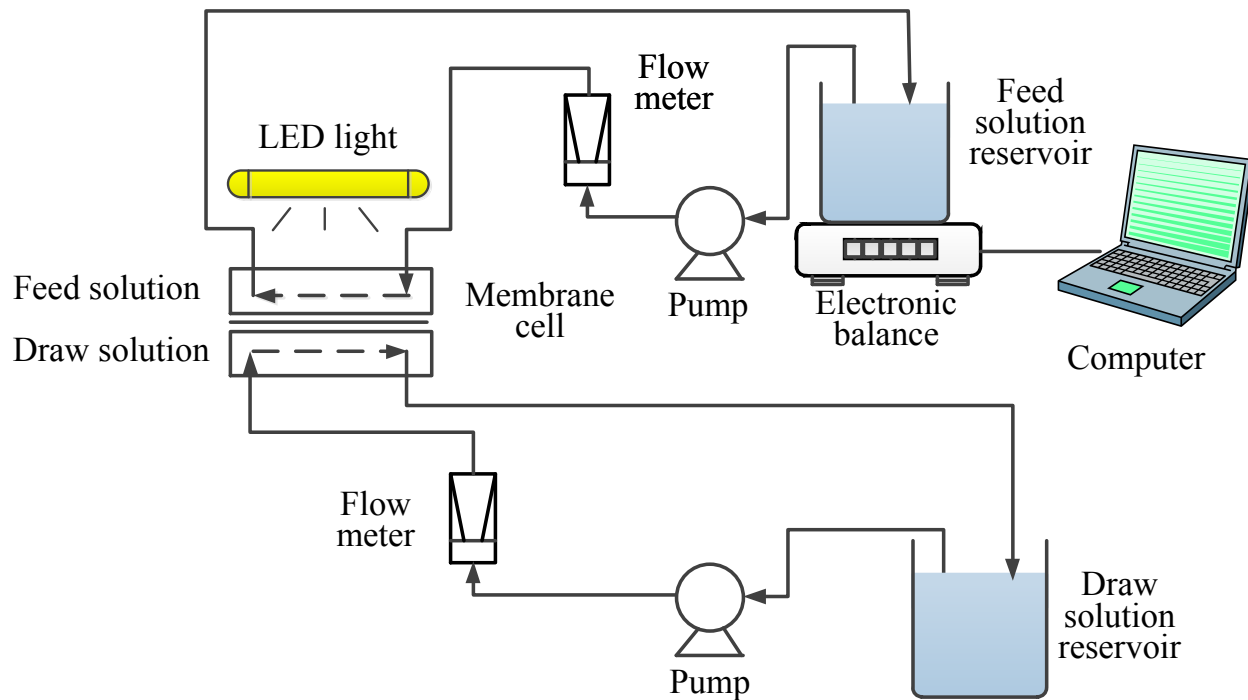

20  
21  
22 **Fig. S1** Schematic diagram of the laboratory-scale FO unit

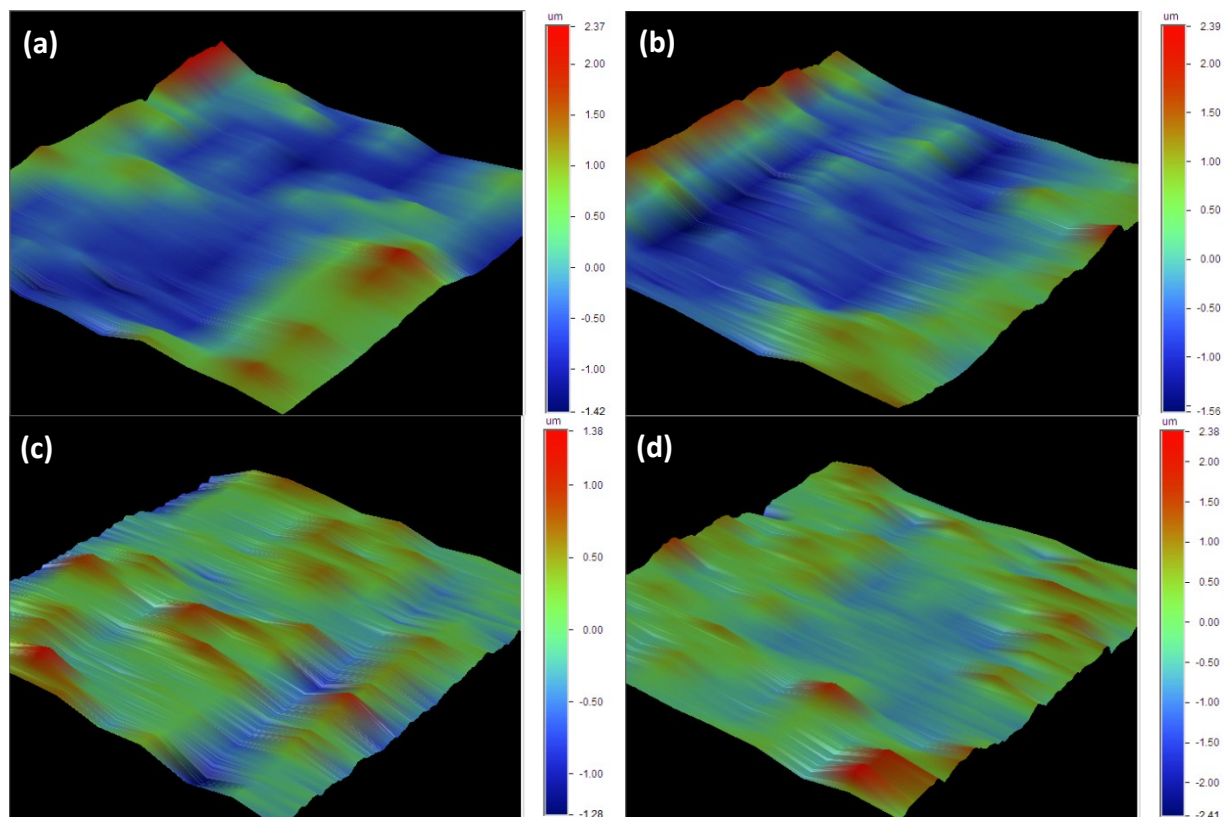

23  
24  
25 **Fig. S2** Two-dimensional surface profiles of membrane active surfaces: (a) virgin CTA membrane, (b)

modified CTA membrane, (c) virgin AqP membrane, and (d) modified AqP membrane.
